# Supplementary material
Source: PubMed Central journal article supplement (PMC4200489)
Supplement: npp2014129x1.pdf [file npp2014129x1.pdf]

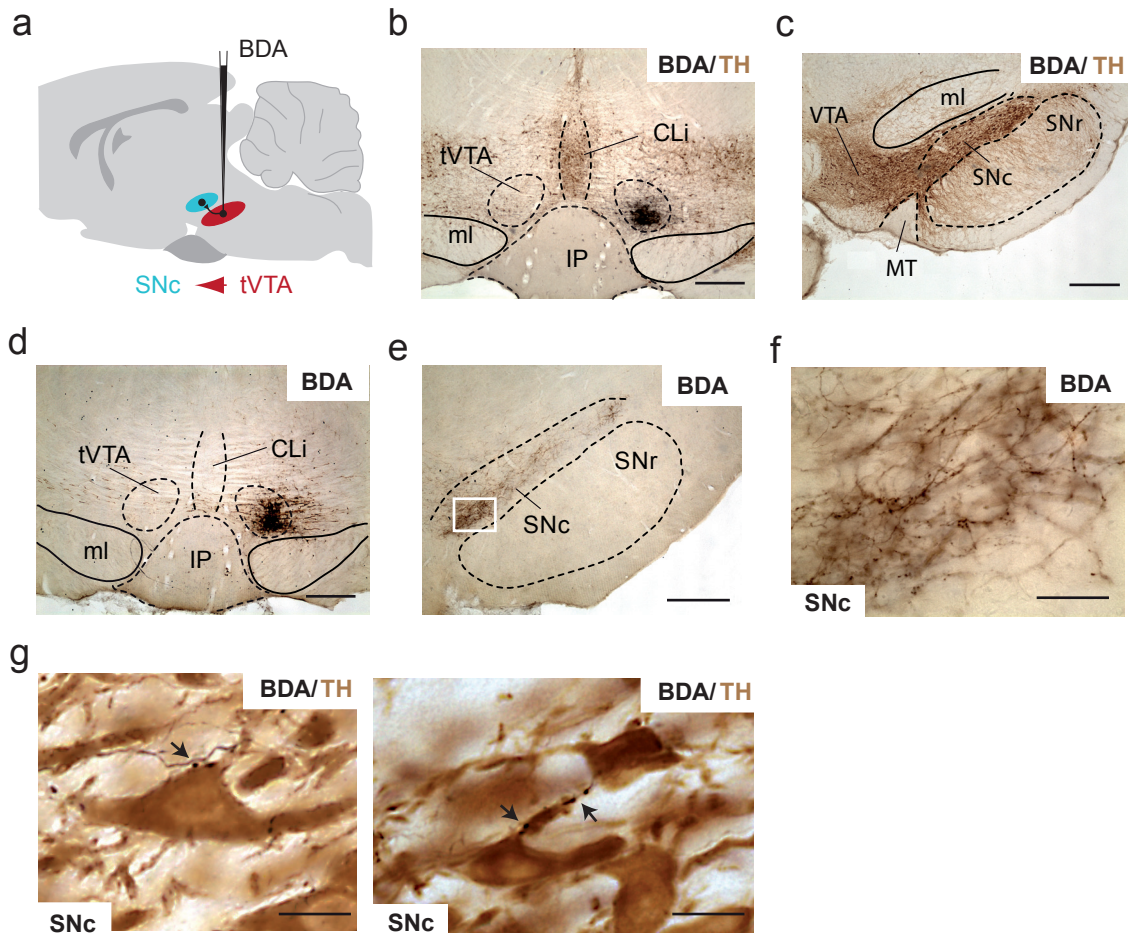

**Figure S1.** The tVTA neurons project to the SNc. **(a)** Experimental protocol for BDA injection into the tVTA ( $n = 7$ ). **(b)** Example of a BDA injection site into the tVTA (black) with TH co-labeling (brown). **(c)** Example of the anterograde labeling observed in the SNc following BDA injection into the tVTA with TH co-labeling. **(d)** Example of a BDA injection site into the tVTA. **(e, f)** Example of the anterograde labeling observed in the SNc following BDA injection into the tVTA. **(e,** larger view; **f,** details of boxed area). **(g)** Examples of tVTA terminals making appositions (black arrows) on dopamine neurons in the SNc. BDA, biotinylated dextran amine; CLi, caudal linear nucleus of the raphe; CTb, cholera toxin  $\beta$ -subunit; IP, interpeduncular nucleus; ml, medial lemniscus; MT, medial terminal nucleus of the accessory optic tract; SNc, substantia nigra pars compacta; SNr, substantia nigra pars reticulata; TH, tyrosine hydroxylase; VTA, ventral tegmental area. Scale bars = 500  $\mu\text{m}$  in **(b-e)**, 10  $\mu\text{m}$  in **(f, g)**.

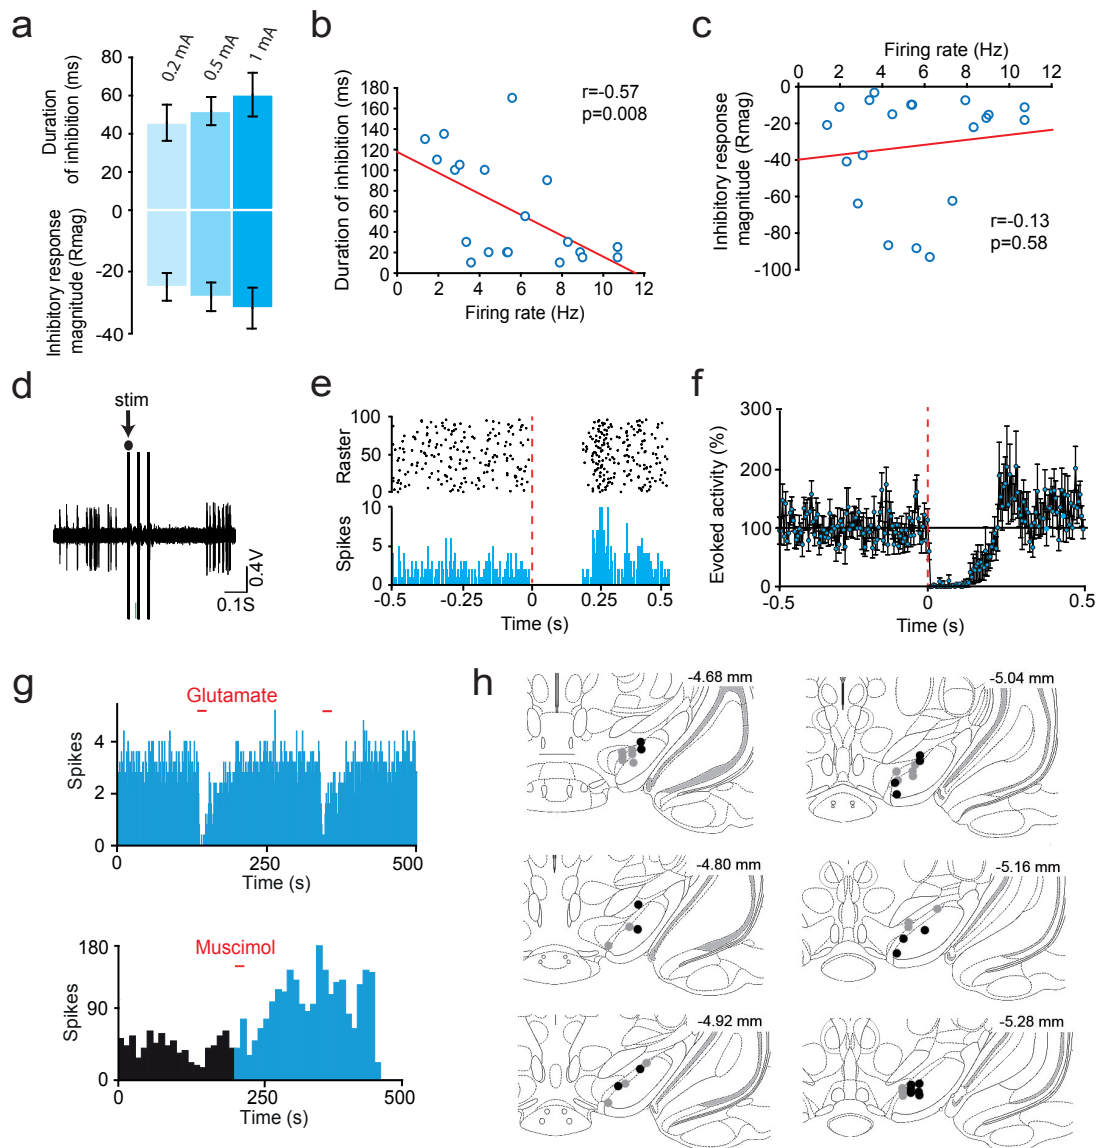

**Figure S2.** The tVTA exerts an inhibitory influence over SNc dopamine neurons. **(a)** The inhibition duration and inhibitory response magnitude of SNc dopamine neurons for tVTA stimulation at 0.2 ( $n = 13$ ), 0.5 ( $n = 24$ ) and 1 mA ( $n = 19$ ). At 1 mA stimulation, 95% of neurons were inhibited (18 out of 19 neurons) with an onset of inhibition of  $3.2 \pm 1.3$  ms, an inhibition duration of  $60.5 \pm 11.4$  ms and an inhibition magnitude of  $-32.2 \pm 6.6$ . **(b)** The duration of inhibition of SNc dopamine neurons is inversely correlated to their spontaneous activity (1 mA,  $n = 19$ ; linear regression,  $r = -0.57$ ,  $p < 0.01$ ). **(c)** The magnitude of the inhibitory response of SNc dopamine neurons is not correlated to their spontaneous activity (1 mA,  $n = 19$ ; linear regression,  $r = 0.13$ ,  $p = 0.58$ ). **(d)** Example of a spike trace of a SNc dopamine neuron with 3 pulses of tVTA stimulation at 1 mA. **(e)** Consequence of 3 pulses of tVTA stimulation on a single SNc dopamine neuron **(f)** and on the mean of 9 neurons **(f,  $n = 9$ ,  $F_{98,784} = 5.6$ ,  $p < 0.001$ )**. **(g)** Examples of unitary activities from single SNc dopamine neurons after tVTA chemical manipulation. For glutamate, the chemical stimulation was repeated twice for the presented neuron. **(h)** Estimated locations of the recorded neurons in the SNc corresponding to Figure 4b (grey circles, control group; black circles, tVTA lesion group). Graphs represent mean  $\pm$  SEM.
